# Supplementary material
Source: PubMed Central journal article supplement (PMC8423430)
Supplement: mmc1.pdf [file mmc1.pdf]

# THE LANCET

## Infectious Diseases

### Supplementary appendix

This appendix formed part of the original submission. We post it as supplied by the authors.

This online publication has been corrected. The corrected version first appeared at [thelancet.com/infection](https://www.thelancet.com/infection) on November 15, 2021.

Supplement to: Juthani PV, Gupta A, Borges KA, et al. Hospitalisation among vaccine breakthrough COVID-19 infections. *Lancet Infect Dis* 2021; published online Sept 7. [https://doi.org/10.1016/S1473-3099\(21\)00558-2](https://doi.org/10.1016/S1473-3099(21)00558-2).

**A****Hospitalized with COVID-19 PCR+**

Total=969

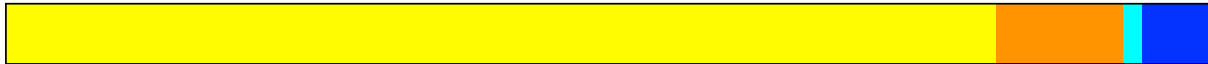

- Unvaccinated (n=797)
- Partial course (1 dose of Pfizer or Moderna) (n=103)
- Completed course (2 doses of Pfizer or Moderna or 1 dose of Janssen) (n=15)
- Fully vaccinated (14 days after completed course) (n=54)

**B****Fully Vaccinated Disease Severity**

Total=54

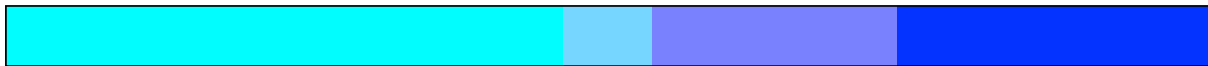

- Asymptomatic (n=25)
- Mild Disease (n=4)
- Moderate Disease (n=11)
- Severe/Critical Disease (n=14)

**C****Disease Severity by Vaccine Type among Fully Vaccinated**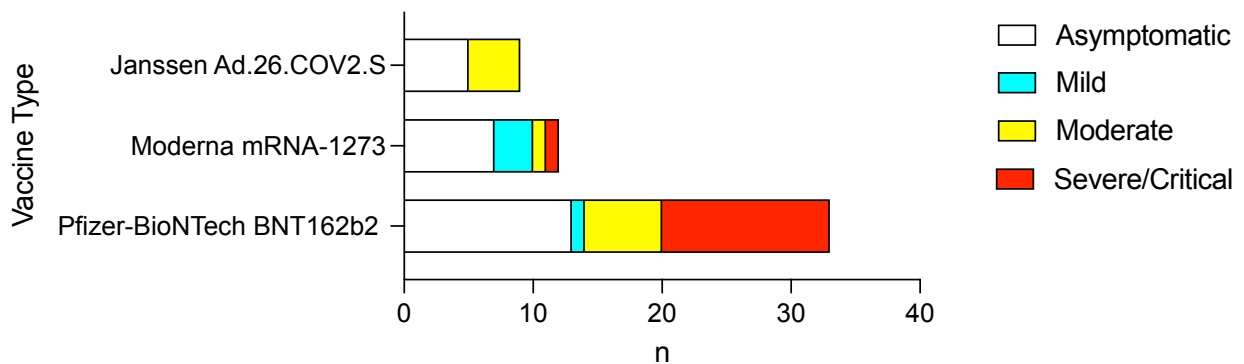

**Figure:** A) Classification of all patients admitted to YNHH between March 23, 2021 and July 1, 2021 who tested positive for a SARS-CoV-2 PCR test by their vaccination status.

B) Disease severity among hospitalized patients with positive SARS-CoV-2 PCR test considered to be fully vaccinated. Disease severity in the figure is denoted as asymptomatic, mild disease, moderate disease, and severe/critical disease based on the following: 1)

Asymptomatic: Individuals who test positive for SARS-CoV-2 using a virologic test (i.e., a nucleic acid amplification test or an antigen test) but who have no symptoms that are consistent with COVID-19. 2) Mild: Individuals who have any of the various signs and symptoms of COVID-19 (e.g., fever, cough, sore throat, malaise, headache, muscle pain, nausea, vomiting, diarrhea, loss of taste and smell) but who do not have shortness of breath, dyspnea, or abnormal chest imaging. 3) Moderate: Individuals who show evidence of lower respiratory disease during clinical assessment or imaging and who have saturation of oxygen (SpO<sub>2</sub>) ≥94% on room air at sea level. 4) Severe: Individuals who have SpO<sub>2</sub> <94% on room air at sea level, a ratio of arterial partial pressure of oxygen to fraction of inspired oxygen (PaO<sub>2</sub>/FiO<sub>2</sub>) <300 mm Hg, respiratory frequency >30 breaths/min, or lung infiltrates >50%. 5) Critical: Individuals who have respiratory failure, septic shock, and/or multiple organ dysfunction. C) Distribution of disease severity among fully vaccinated individuals by vaccine type.

| Age | Gender | BMI   | Vaccine type | COVID-19 severity | No. of days between final vaccine dose & symptom onset or positive COVID-19 test | Highest level of care | Highest vent. support | Inotrope support | Outcome    | CV | Lung | Malign. | DM II | Immuno sup. agent |
|-----|--------|-------|--------------|-------------------|----------------------------------------------------------------------------------|-----------------------|-----------------------|------------------|------------|----|------|---------|-------|-------------------|
| 71  | M      | 19.55 | P            | severe            | 47                                                                               | non-ICU               | 2L NC                 | N                | discharged | Y  | Y    | N       | N     | N                 |
| 76  | M      | 26.79 | P            | severe            | 18                                                                               | non-ICU               | 4L NC                 | N                | discharged | Y  | Y    | N       | Y     | Y                 |
| 78  | F      | 31.91 | P            | severe            | 79                                                                               | non-ICU               | 2L NC                 | N                | discharged | Y  | N    | N       | Y     | N                 |
| 79  | F      | 31.98 | P            | severe            | 55                                                                               | non-ICU               | 3L NC                 | N                | discharged | Y  | N    | Y       | N     | Y                 |
| 81  | F      | 39.55 | P            | severe            | 72                                                                               | non-ICU               | 2L NC                 | N                | discharged | Y  | Y    | N       | Y     | N                 |
| 85  | F      | 26.2  | P            | severe            | 52                                                                               | non-ICU               | 4L NC                 | N                | discharged | Y  | N    | N       | N     | N                 |
| 85  | M      | 21.35 | P            | severe            | 54                                                                               | non-ICU               | 4L NC                 | N                | deceased*  | N  | Y    | Y       | Y     | Y                 |
| 90  | F      | 21.46 | P            | severe            | 68                                                                               | non-ICU               | 4L NC                 | N                | discharged | Y  | N    | N       | N     | N                 |
| 91  | F      | 33.38 | P            | severe            | 87                                                                               | non-ICU               | 2L NC                 | N                | discharged | Y  | N    | N       | N     | N                 |
| 95  | M      | 26.2  | P            | severe            | 93                                                                               | non-ICU               | 3L NC                 | N                | discharged | Y  | N    | Y       | Y     | N                 |
| 65  | F      | 44.44 | M            | critical          | 26                                                                               | ICU                   | NIPPV                 | N                | deceased   | Y  | Y    | N       | Y     | Y                 |
| 76  | M      | 19.53 | P            | critical          | 34                                                                               | ICU                   | 4L NC                 | Y                | deceased   | N  | N    | N       | N     | N                 |
| 80  | M      | 23.49 | P            | critical          | 70                                                                               | ICU                   | HFNC                  | N                | discharged | Y  | Y    | N       | Y     | N                 |
| 84  | M      | 26.91 | P            | critical          | 58                                                                               | ICU                   | MV                    | Y                | deceased   | Y  | Y    | Y       | N     | N                 |

**Table:** Demographics and comorbidities of patients fully vaccinated for SARS-CoV-2 who are hospitalised with a positive SARS-CoV-2

PCR test. Patients are listed in the order of worsening disease severity. BMI: body mass index. NC: nasal cannula. NIPPV: non-invasive positive pressure ventilation. HFNC: high flow nasal cannula. MV: mechanical ventilation. CV: history of coronary artery disease or congestive heart failure. Lung: history of lung disease. Malign: history of malignancy. DM II: history of diabetes mellitus type II. Immunosup. agent: outpatient immunosuppressive agent use. P: Pfizer-BioNTech BNT162b2, M: Moderna mRNA-1273. \*Patient was discharged from his COVID-19 related hospitalisation, but was subsequently readmitted for non-COVID-19 infection related illness and died during the second hospitalisation.
